# Supplementary material for: The amphibian microbiome exhibits poor resilience following pathogen-induced disturbance
Source: PubMed Central journal article supplement (PMC8163836; doi:10.1038/s41396-020-00875-w), 2021-02-09
Supplement: 41396_2020_875_MOESM1_ESM.pdf [file 41396_2020_875_MOESM1_ESM.pdf]

## SUPPORTING MATERIALS

PERMIT NUMBERS FOR HANDLING OF RANA MUSCOSA: US Fish and Wildlife Service (TE-40090B-1, TE40087B-2, TE-92167B, biological opinion 08ESMF00-2016-F-1174), National Park Service (SEKI-2015-SCI-0062, SEKI-2016-SCI-0038), CA Department of Fish and Wildlife Scientific Collecting Permit SC-000304. Approval from the UCSB and UC Davis IACUC (UCSB protocol #478, UC Davis #20629, #19974).

### VISUALIZING MICROBIOME DISTURBANCE.

Note: Data analyses of community composition were conducted directly on the Unifrac distance matrices. The following metrics were used for visualization purposes only, to enable display of the overall shift in community composition of the Bd-exposed group relative to the control group. We computed the weighted Unifrac distance between each frog in the Bd+ group and each frog in the Bd- group, then took the mean of all comparisons in a given time point. We estimated standard error by dividing the standard deviation by the square root of the number of frogs in the Bd- group. (Although standard error is normally calculated based on the total samples size, in this case the sum of frogs in both treatments, in our case using the number of frogs from both groups treatments would have under-estimated standard error because our questions relate to pairs of frogs in the two groups. We chose the sample size of the Bd- group because there were fewer control frogs than Bd+ frogs, so the Bd- sample size is more conservative.

### PREDICTORS OF MICROBIOME STABILITY.

We tested if alpha diversity or frog individual predict stability, where stability is measured as the magnitude of microbiome change (displacement) through time. As a metric of microbiome displacement through time, we calculated the Unifrac distance between time points for each frog. This difference was calculated for the transition from pre-infection to the post-infection stage (phase 1 of the experiment), and again for the transition from the post-infection stage to the recovery stage (phase 2). Many studies focus on alpha diversity as a potential predictor of stability (Downing et al., 2014; Ives and Carpenter, 2007; Shade, 2017). We therefore tested for a correlation between initial alpha diversity and microbiome displacement. It is also possible that individual frogs inherently vary in the stability of their microbiomes (e.g. (Harrison et al., 2019)). We used linear regression to test if stability is an inherent property of individual frogs by testing if microbiome displacement in the first phase of the experiment predicts displacement in the second phase.

Downing, A.L., Brown, B.L., and Leibold, M.A. (2014). Multiple diversity–stability mechanisms enhance population and community stability in aquatic food webs. *Ecology* 95, 173–184.

Harrison, X.A., Price, S.J., Hopkins, K., Leung, W.T.M., Sergeant, C., and Garner, T.W.J. (2019). Diversity-Stability Dynamics of the Amphibian Skin Microbiome and Susceptibility to a Lethal Viral Pathogen. *Frontiers in Microbiology* 10.

Ives, A.R., and Carpenter, S.R. (2007). Stability and Diversity of Ecosystems. *Science* 317, 58–62.  
Shade, A. (2017). Diversity is the question, not the answer. *The ISME Journal* 11, 1–6.

PLUMAS (*R. SIERRAE*) POPULATION HARBORS DIFFERENT MICROBIOTA FROM *R. MUSCOSA* POPULATIONS.

For the pre-exposure time point, we conducted additional analyses on the effects of frog source population and frog tank on the microbiome. These analyses include a fifth population (Plumas, N=10), and do not include Bd exposure as a factor because, at this time point, no frogs in the experiment were exposed to Bd. We tested if alpha diversity or community composition differed among groups of frogs from the five source populations. Diversity and composition were analyzed by linear models and PERMANOVA, respectively, as described in the main manuscript. RESULTS. Alpha diversity did not differ among source populations ( $P > 0.05$  for all diversity metrics). Community composition did differ among source populations ( $P < 0.001$ ). When Plumas frogs were excluded from the analysis, population no longer had a significant effect on the microbiome (main text), indicating that the population effect was primarily due to the fact that the Plumas frogs differed from other populations. We followed up this main PERMANOVA test with pairwise PERMANOVA using the pairwise.adonis function (pairwiseAdonis package in R) conducted using Bray Curtis distance and Holm method multiple comparisons adjustment. The pairwise test showed that Plumas microbiomes differed from Tyndall, Milestone, and Pinchot ( $P = 0.010, 0.016, 0.010$ , respectively). All other pairwise comparisons between populations were not significant ( $P > 0.05$ ). The Plumas population (located in the northern Sierra) is geographically distant from the other four populations (southern Sierra). The Plumas population is also a separate species (*Rana sierrae*) compared with the other populations (*Rana muscosa*). Therefore environmental differences or frog genetic differences between the northern and southern regions could explain the difference in microbiomes.

NMDS ordination of frog microbiomes prior to Bd exposure. Frog species designations are RAMU (*Rana muscosa*) and RASI (*Rana sierrae*).

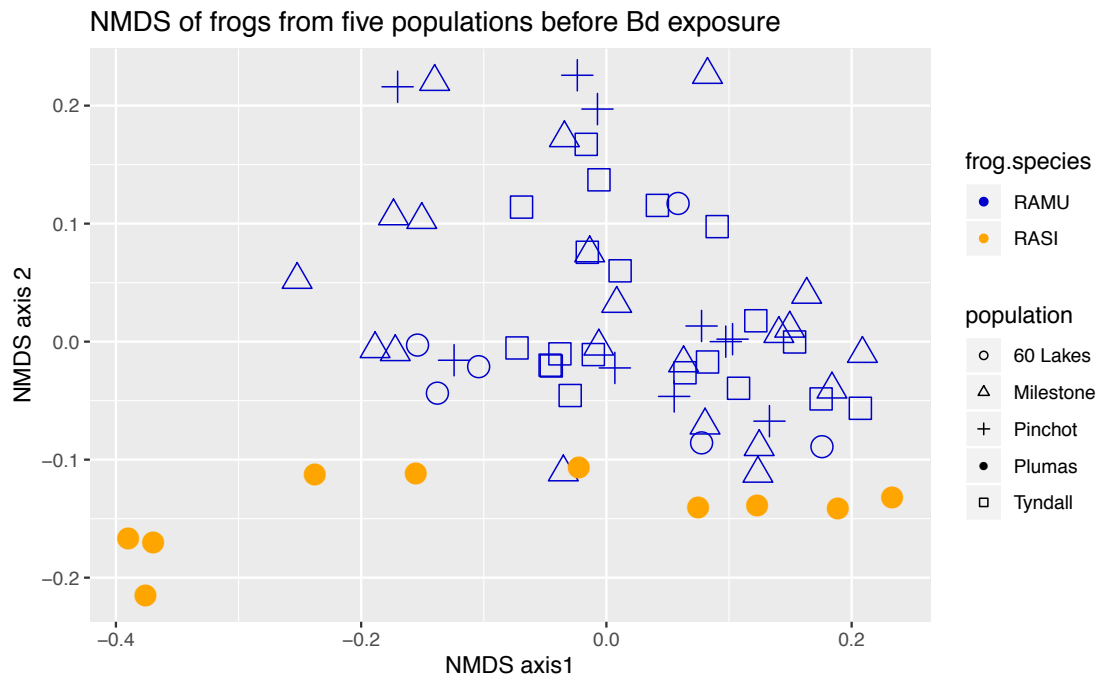

FIGURE S1. Mean relative abundances of common taxa for each treatment and time point.

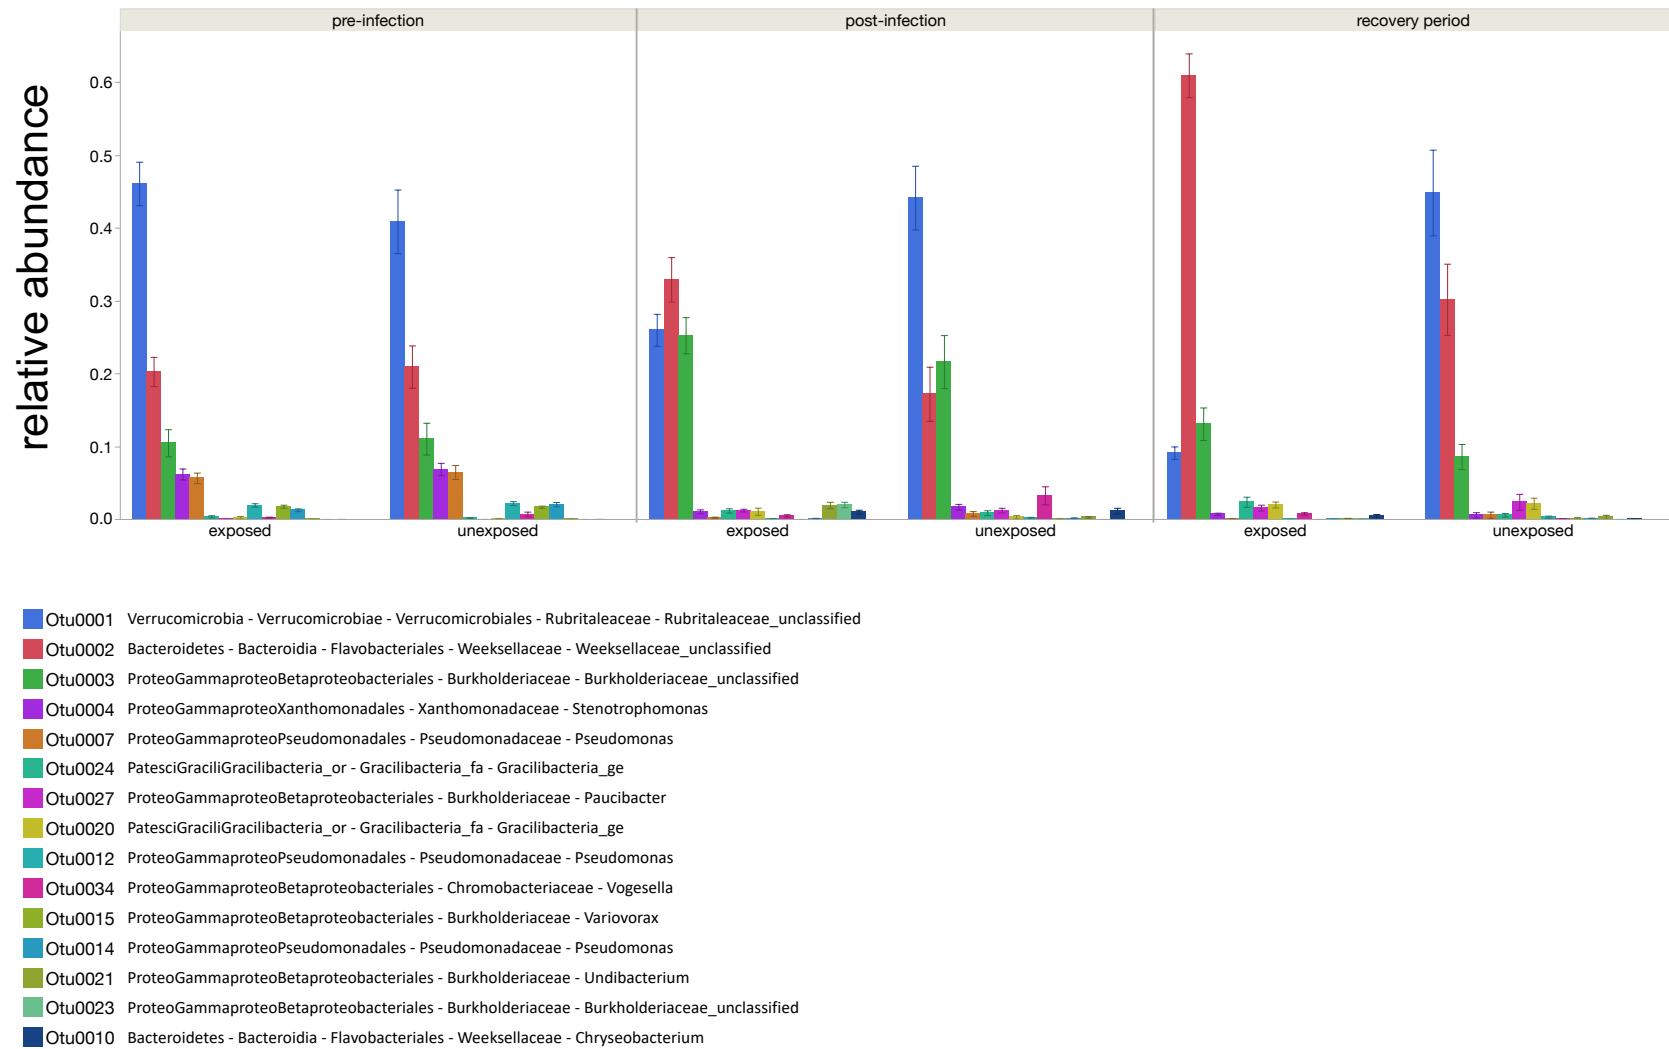

FIGURE S2 Relative abundances of common bacterial taxa on every frog, at every time point. Only ASVs with representing at least 0.1% of reads are shown. Gaps (white space) between tops of stacked bars and 1.0 mark on Y-axis represent rare ASVs. Legend for ASV taxonomy on following page.

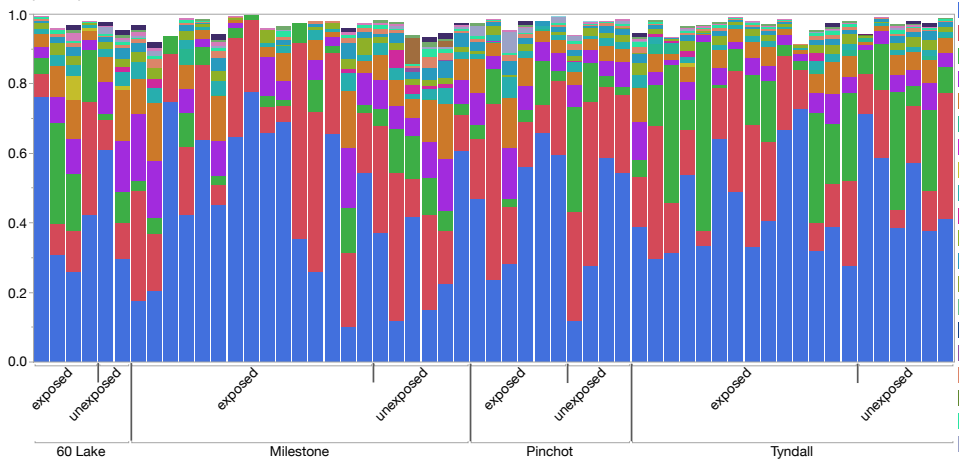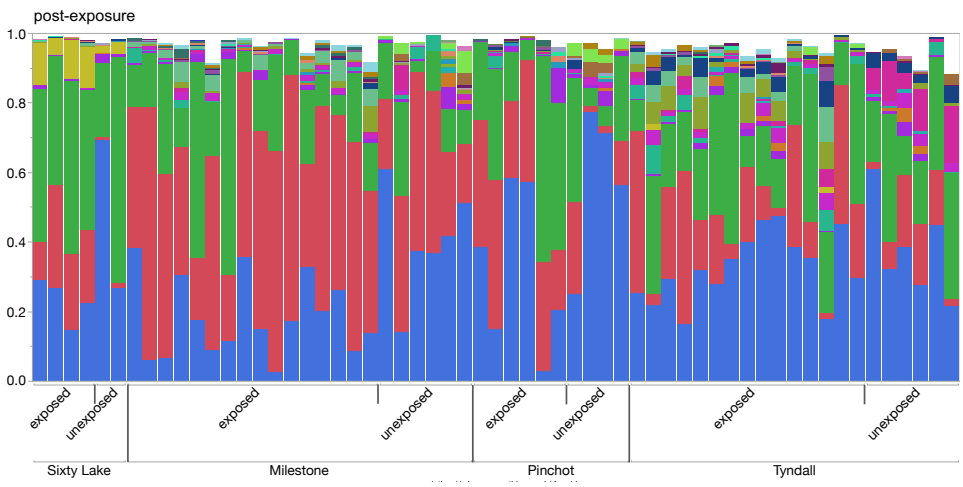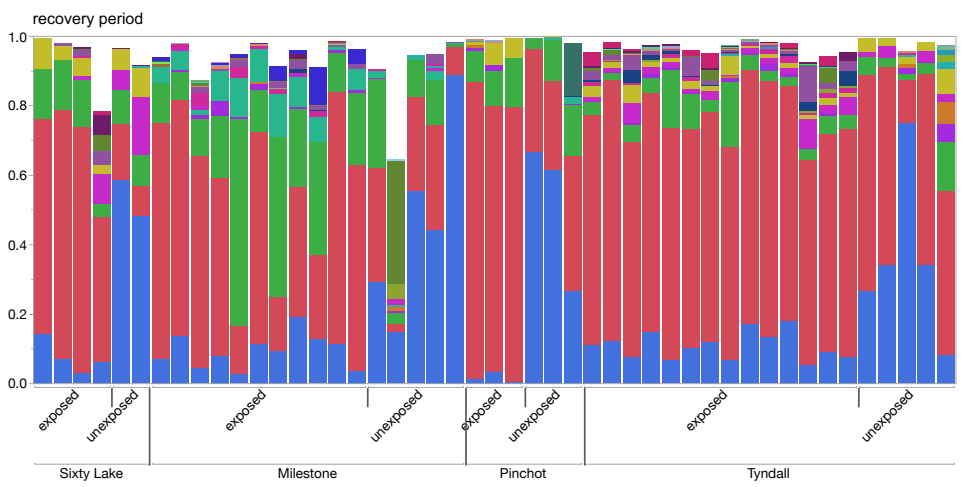

## Figure S2 Legend

- Otu0001 Verrucomicrobia - Verrucomicrobiae - Verrucomicrobiales - Rubritaleaceae - Rubritaleaceae\_unclassified
- Otu0002 Bacteroidetes - Bacteroidia - Flavobacteriales - Weeksellaceae - Weeksellaceae\_unclassified
- Otu0003 ProteoGammaproteoBetaproteobacteriales - Burkholderiaceae - Burkholderiaceae\_unclassified
- Otu0004 ProteoGammaproteoXanthomonadales - Xanthomonadaceae - Stenotrophomonas
- Otu0007 ProteoGammaproteoPseudomonadales - Pseudomonadaceae - Pseudomonas
- Otu0024 PatesciGraciliGracilibacteria\_or - Gracilibacteria\_fa - Gracilibacteria\_ge
- Otu0027 ProteoGammaproteoBetaproteobacteriales - Burkholderiaceae - Paucibacter
- Otu0020 PatesciGraciliGracilibacteria\_or - Gracilibacteria\_fa - Gracilibacteria\_ge
- Otu0012 ProteoGammaproteoPseudomonadales - Pseudomonadaceae - Pseudomonas
- Otu0034 ProteoGammaproteoBetaproteobacteriales - Chromobacteriaceae - Vogesella
- Otu0015 ProteoGammaproteoBetaproteobacteriales - Burkholderiaceae - Variovorax
- Otu0014 ProteoGammaproteoPseudomonadales - Pseudomonadaceae - Pseudomonas
- Otu0021 ProteoGammaproteoBetaproteobacteriales - Burkholderiaceae - Undibacterium
- Otu0023 ProteoGammaproteoBetaproteobacteriales - Burkholderiaceae - Burkholderiaceae\_unclassified
- Otu0010 Bacteroidetes - Bacteroidia - Flavobacteriales - Weeksellaceae - Chryseobacterium
- Otu0033 Bacteroidetes - Bacteroidia - Flavobacteriales - Flavobacteriaceae - Flavobacterium
- Otu0025 ProteoGammaproteoEnterobacteriales - Enterobacteriaceae - Enterobacteriaceae\_unclassified
- Otu0005 Bacteroidetes - Bacteroidia - Sphingobacteriales - env.OPS\_17 - env.OPS\_17\_ge
- Otu0031 ProteoGammaproteoEnterobacteriales - Enterobacteriaceae - Enterobacteriaceae\_unclassified
- Otu0044 ProteoGammaproteoPseudomonadales - Pseudomonadaceae - Pseudomonas
- Otu0013 ProteoGammaproteoBetaproteobacteriales - Burkholderiaceae - Delftia
- Otu0086 ProteoGammaproteoAeromonadales - Aeromonadaceae - Aeromonas
- Otu0037 ProteoGammaproteoBetaproteobacteriales - Chromobacteriaceae - Crenobacter
- Otu0016 ProteoGammaproteoPseudomonadales - Pseudomonadaceae - Pseudomonas
- Otu0103 ProteoGammaproteoBetaproteobacteriales - Burkholderiaceae - Comamonas
- Otu0042 ActinoActinoMicrococcales - Sanguibacteraceae - Sanguibacter
- Otu0029 ProteoGammaproteoBetaproteobacteriales - Burkholderiaceae - Rhodoferrax
- Otu0053 ProteoGammaproteoEnterobacteriales - Enterobacteriaceae - Enterobacteriaceae\_unclassified
- Otu0008 ProteoGammaproteoBetaproteobacteriales - Methylophilaceae - Methylophilus
- Otu0064 ProteoGammaproteoPseudomonadales - Pseudomonadaceae - Pseudomonas
- Otu0087 ProteoGammaproteoBetaproteobacteriales - Burkholderiaceae - Acidovorax

FIGURE S3. Bd loads.

Bd loads at each time point for Bd+ (red) and Bd- (blue) treatments. Box plots show median and quantiles; points are outliers. We did not attempt to show every data point (dot plot) because the data distributions are very tight: many points overlap and obscure each other even when jittered. Figure 1 in the main manuscript reflects the same data set, but for clarity shows only means for Bd+ frogs.

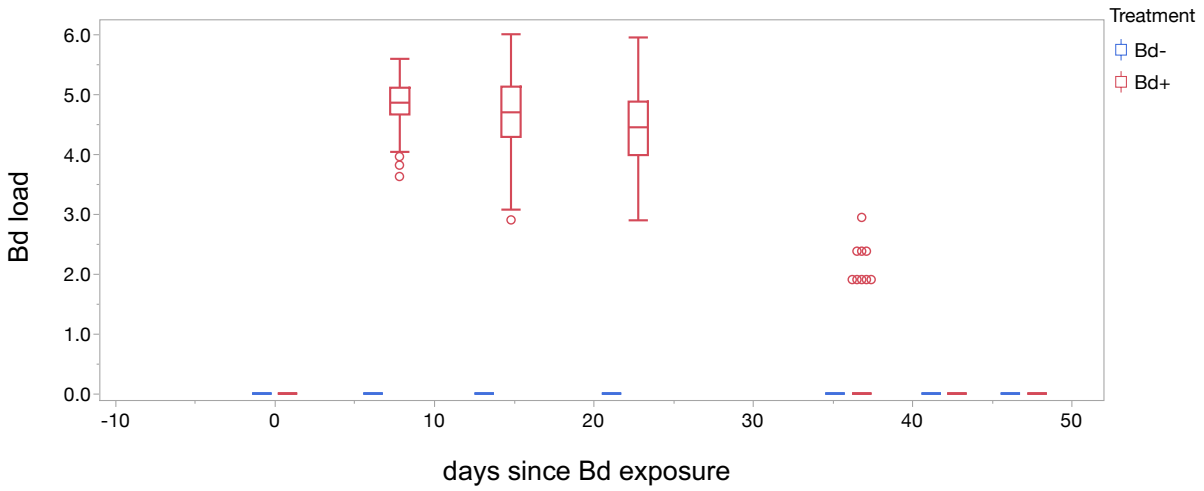

FIGURE S4. TAXA AFFECTED BY BD.

Relative abundances of bacterial taxa affected by Bd exposure. Bar colors distinguish frog source populations. Horizontal black solid and dashed lines show mean and median, respectively, for each frog population. Large plots outlined in red show abundances after Bd exposure (effect of Bd infection). Smaller plots outlined in black show taxa that differed between Bd-exposed and unexposed frogs even after Bd infections were cleared.

Bacteria with greater abundance in Bd-exposed frogs:

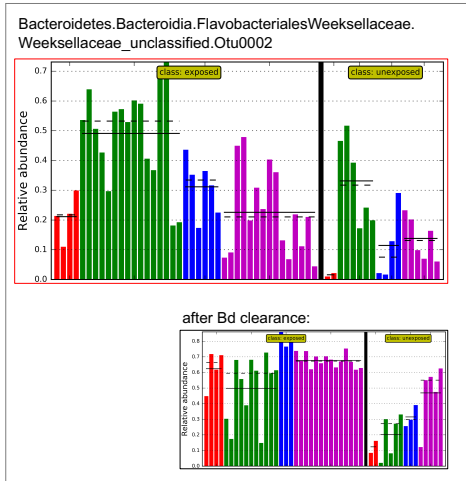

Bacteria with greater abundance in unexposed frogs:

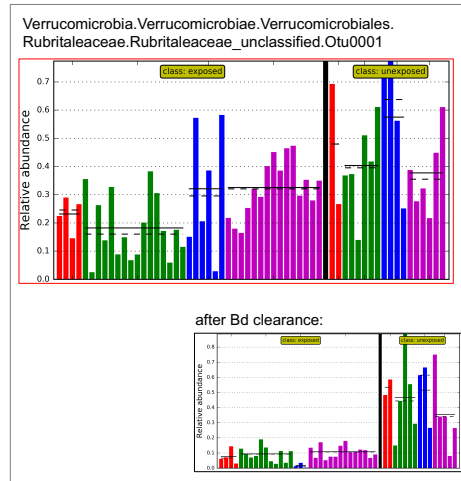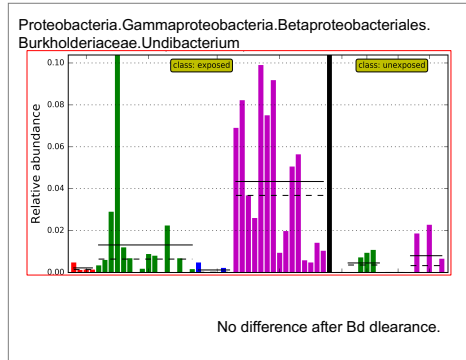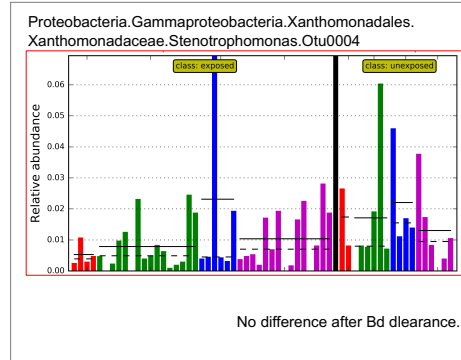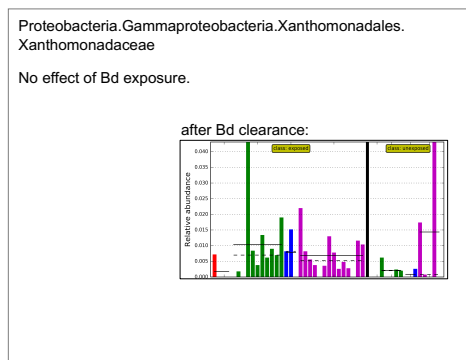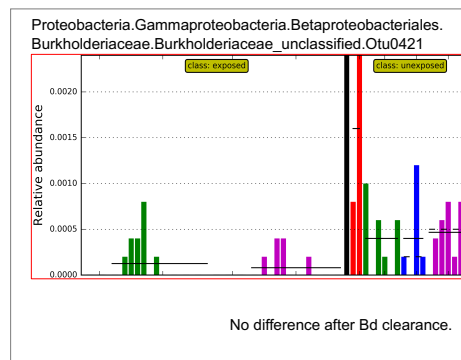

## SUPPLEMENTARY TABLES

### TABLE S1A,B. SOURCE POPULATIONS AND SAMPLE SIZES.

\* Clade refers to genetic clade of the frogs in this study according to (Vredenburg et al., 2007).

\*\* All frogs were swabbed for Bd infection on every sampling date. Microbiome data were generated for a subset of frogs on 3 sampling dates.

Frogs from the Plumas population were excluded from this study because there were no Bd-negative controls for Plumas.

Table S1-A Total sample sizes by population.

| population | clade* | # frogs in study**<br>Total and (subset swabbed for microbiome) | exposed | unexposed |
|------------|--------|-----------------------------------------------------------------|---------|-----------|
| Sixty Lake | 4      | 12 (6)                                                          | 8 (4)   | 4 (2)     |
| Milestone  | 4      | 46 (22)                                                         | 32 (16) | 14 (6)    |
| Pinchot    | 4      | 25 (10)                                                         | 17 (6)  | 8 (4)     |
| Tyndall    | 5      | 42 (21)                                                         | 30 (15) | 12 (6)    |

Table S1-B. Samples sizes in final analyses (after bioinformatic QC), broken down by treatment and time point.

| Population | Pre-infection |           | Post-infection |           | Recovery period |           |
|------------|---------------|-----------|----------------|-----------|-----------------|-----------|
|            | Exposed       | Unexposed | Exposed        | Unexposed | Exposed         | Unexposed |
| Sixty Lake | 4             | 2         | 4              | 2         | 4               | 2         |
| Milestone  | 15            | 6         | 16             | 6         | 11              | 5         |
| Pinchot    | 6             | 4         | 6              | 4         | 3               | 3         |
| Tyndall    | 14            | 6         | 15             | 6         | 14              | 5         |

Vredenburg, V.T., R. Bingham, Knapp, R., Morgan, J. a. T., Moritz, C., and Wake, D. (2007). Concordant molecular and phenotypic data delineate new taxonomy and conservation priorities for the endangered mountain yellow-legged frog. *Journal of Zoology* 271, 361–374.



TABLE S2. MICROBIOME COMPOSITION (PERMANOVA)  
FOR ALL TIME POINTS TOGETHER

Effects of experiment phase, Bd treatment, frog population, experimental tank within population, and PIT tag group on microbiome composition. A single PERMANOVA test was run on all three time points together.

| term                            | P-value | R squared |
|---------------------------------|---------|-----------|
| population                      | <0.001  | 0.037     |
| experiment phase (i.e., time)   | <0.001  | 0.283     |
| Bd treatment                    | <0.001  | 0.063     |
| tank                            | 0.334   | NA        |
| PIT tag group                   | 0.601   | NA        |
| population x experiment phase   | <0.001  | 0.082     |
| Bd treatment x experiment phase | <0.001  | 0.057     |

Table S3. ALPHA DIVERSITY  
ANALYSIS WITH ALL TIME POINTS TOGETHER

Linear mixed model:

$Y \sim \text{Time Period} + \text{Bd} + \text{Population} + \text{Bd} * \text{Population} + \text{PIT tag group} + \text{tank}(\text{random})$

Data are P-values, Benjamini-Hochberg adjusted.

| term                            | Shannon diversity | "species" (ASVs) observed | Chao's diversity | Shannon evenness |
|---------------------------------|-------------------|---------------------------|------------------|------------------|
| experiment phase (i.e., time)   | 0.0011            | 0.0011                    | 0.0078           | 0.1300           |
| experiment phase x population   | 0.0432            | 0.8600                    | 0.8600           | 0.0259           |
| population                      | 0.8600            | 0.4423                    | 0.7445           | 0.8600           |
| Bd treatment x experiment phase | 0.8600            | 0.7715                    | 0.8600           | 0.8600           |
| Bd treatment x population       | 0.8600            | 0.8600                    | 0.8600           | 0.8600           |
| Bd treatment                    | 0.8600            | 0.8600                    | 0.8600           | 0.8600           |
| PIT tag group                   | 0.8600            | 0.8600                    | 0.8600           | 0.8600           |

TABLE S4. DISPERSION, separate test for each time period.

Effects of bd exposure on multivariate dispersion of composition (Betadisper on Unifrac distance)

| experiment phase | P-value (Bd exposure) |
|------------------|-----------------------|
| pre-exposure     | 0.716                 |
| post-exposure    | 0.880                 |
| recovery period  | 0.013                 |

Table S5. DISPERSION: Pairwise comparisons (across all treatments and time points) of the within-group dispersion. This analysis tests whether any treatment-by-timepoint group has less variable microbiomes (lower within-group dispersion) than other groups.

| <b>group 1</b>              | <b>group 2</b>              | <b>P-value</b> |
|-----------------------------|-----------------------------|----------------|
| post-infection, Bd-exposed  | recovery period, Bd-exposed | <0.001         |
| pre-infection, Bd-exposed   | recovery period, Bd-exposed | 0.007          |
| post-infection, unexposed   | recovery period, Bd-exposed | 0.01           |
| recovery period, Bd-exposed | recovery period, unexposed  | 0.023          |
| pre-infection, unexposed    | recovery period, Bd-exposed | 0.049          |
| pre-infection, unexposed    | post-infection, Bd-exposed  | 0.149          |
| pre-infection, Bd-exposed   | post-infection, Bd-exposed  | 0.152          |
| pre-infection, unexposed    | post-infection, unexposed   | 0.255          |
| pre-infection, Bd-exposed   | post-infection, unexposed   | 0.346          |
| pre-infection, unexposed    | recovery period, unexposed  | 0.431          |
| pre-infection, Bd-exposed   | recovery period, unexposed  | 0.537          |
| pre-infection, Bd-exposed   | pre-infection, unexposed    | 0.716          |
| post-infection, Bd-exposed  | recovery period, unexposed  | 0.761          |
| post-infection, Bd-exposed  | post-infection, unexposed   | 0.872          |
| post-infection, unexposed   | recovery period, unexposed  | 0.877          |

TABLE S6. MICROBIOME COMPOSITION (PERMANOVA) FOR EACH TIME POINT

Effects of Bd treatment, frog population, experimental tank within population, and PIT tag group on microbiome composition, broken down by time point. Bd\*population interaction was not significant in any test.

| <b>experiment phase</b> | <b>P-value (Bd exposure)</b> | <b>R squared (Bd exposure)</b> | <b>P-value (population)</b> | <b>R squared (population)</b> | <b>P-value (tank)</b> | <b>R squared (tank)</b> | <b>P-value (PIT tag group)</b> | <b>R squared (PIT tag group)</b> |
|-------------------------|------------------------------|--------------------------------|-----------------------------|-------------------------------|-----------------------|-------------------------|--------------------------------|----------------------------------|
| pre-infection           | 0.442                        | NA                             | 0.108                       | NA                            | 0.369                 | NA                      | 0.165                          | NA                               |
| post-infection          | <0.001                       | 0.12                           | <0.001                      | 0.26                          | 0.002                 | 0.35                    | 0.868                          | NA                               |
| recovery period         | <0.001                       | 0.38                           | 0.005                       | 0.12                          | 0.244                 | NA                      | 0.894                          | NA                               |

TABLE S7. ALPHA DIVERSITY

SEPARATE ANALYSIS FOR EACH TIME POINT

Linear mixed models run separately for each diversity metric:

$Y \sim \text{Bd} + \text{Population} + \text{Bd} * \text{Population} + \text{PIT tag group} + \text{tank}(\text{random})$

**Data are P-values (Benjamini-Hochberg adjusted p-values in parentheses)**

| phase              | term                         | "species"<br>(ASVs)<br>observed | Chao's<br>diversity | Shannon<br>diversity | Shannon<br>evenness |
|--------------------|------------------------------|---------------------------------|---------------------|----------------------|---------------------|
| pre-infection      | Bd treatment                 | 0.191<br>(0.986)                | 0.255<br>(0.986)    | 0.33<br>(0.986)      | 0.511<br>(0.986)    |
| pre-infection      | Bd treatment x<br>population | 0.265<br>(0.986)                | 0.207<br>(0.986)    | 0.379<br>(0.986)     | 0.539<br>(0.986)    |
| pre-infection      | PIT tag group                | 0.82<br>(0.986)                 | 0.614<br>(0.986)    | 0.986<br>(0.986)     | 0.953<br>(0.986)    |
| pre-infection      | population                   | 0.952<br>(0.986)                | 0.985<br>(0.986)    | 0.83<br>(0.986)      | 0.598<br>(0.986)    |
| post-infection     | Bd treatment                 | 0.833<br>(0.986)                | 0.834<br>(0.986)    | 0.668<br>(0.986)     | 0.648<br>(0.986)    |
| post-infection     | Bd treatment x<br>population | 0.292<br>(0.986)                | 0.241<br>(0.986)    | 0.744<br>(0.986)     | 0.221<br>(0.986)    |
| post-infection     | PIT tag group                | 0.817<br>(0.986)                | 0.767<br>(0.986)    | 0.747<br>(0.986)     | 0.693<br>(0.986)    |
| post-infection     | population                   | 0.087<br>(0.986)                | 0.117<br>(0.986)    | 0.039<br>(0.986)     | 0.076<br>(0.986)    |
| recovery<br>period | Bd treatment                 | 0.402<br>(0.986)                | 0.443<br>(0.986)    | 0.528<br>(0.986)     | 0.201<br>(0.986)    |
| recovery<br>period | Bd treatment x<br>population | 0.501<br>(0.986)                | 0.416<br>(0.986)    | 0.731<br>(0.986)     | 0.602<br>(0.986)    |
| recovery<br>period | PIT tag group                | 0.074<br>(0.986)                | 0.095<br>(0.986)    | 0.193<br>(0.986)     | 0.493<br>(0.986)    |
| recovery<br>period | population                   | 0.005<br>(0.233)                | 0.006<br>(0.293)    | 0.026<br>(0.986)     | 0.231<br>(0.986)    |

TABLE S8. LEfSe RESULTS

Linear discriminant analysis effect sizes (LDA scores) and P values.

| <b>Taxonomic group</b>                                                                                          | <b>experiment phase</b> | <b>higher in:</b> | <b>LDA</b> | <b>P</b> |
|-----------------------------------------------------------------------------------------------------------------|-------------------------|-------------------|------------|----------|
| Bacteroidetes                                                                                                   | post-exposure           | exposed           | 4.925      | 0.0021   |
| Bacteroidetes.Bacteroidia                                                                                       | post-exposure           | exposed           | 4.925      | 0.0021   |
| Bacteroidetes.Bacteroidia.Flavobacteriales                                                                      | post-exposure           | exposed           | 4.928      | 0.0021   |
| Bacteroidetes.Bacteroidia.Flavobacteriales.Weeksellaceae                                                        | post-exposure           | exposed           | 4.913      | 0.0025   |
| Bacteroidetes.Bacteroidia.Flavobacteriales.Weeksellaceae.Weeksellaceae_unclassified                             | post-exposure           | exposed           | 4.919      | 0.0025   |
| Bacteroidetes.Bacteroidia.Flavobacteriales.Weeksellaceae.Weeksellaceae_unclassified.Otu0002                     | post-exposure           | exposed           | 4.917      | 0.0025   |
| Proteobacteria.Gammaproteobacteria.Betaproteobacteriales.Burkholderiaceae.Burkholderiaceae_unclassified.Otu0421 | post-exposure           | unexposed         | 3.19       | <0.00001 |
| Proteobacteria.Gammaproteobacteria.Betaproteobacteriales.Burkholderiaceae.Undibacterium                         | post-exposure           | exposed           | 3.947      | 0.0031   |
| Proteobacteria.Gammaproteobacteria.Xanthomonadales                                                              | post-exposure           | unexposed         | 3.505      | 0.049    |
| Proteobacteria.Gammaproteobacteria.Xanthomonadales.Xanthomonadaceae                                             | post-exposure           | unexposed         | 3.505      | 0.049    |
| Proteobacteria.Gammaproteobacteria.Xanthomonadales.Xanthomonadaceae.Stenotrophomonas                            | post-exposure           | unexposed         | 3.505      | 0.049    |
| Proteobacteria.Gammaproteobacteria.Xanthomonadales.Xanthomonadaceae.Stenotrophomonas.Otu0004                    | post-exposure           | unexposed         | 3.526      | 0.037    |
| Verrucomicrobia                                                                                                 | post-exposure           | unexposed         | 4.997      | 0.0009   |
| Verrucomicrobia.Verrucomicrobiae                                                                                | post-exposure           | unexposed         | 4.997      | 0.0009   |
| Verrucomicrobia.Verrucomicrobiae.Verrucomicrobiales                                                             | post-exposure           | unexposed         | 4.997      | 0.0009   |
| Verrucomicrobia.Verrucomicrobiae.Verrucomicrobiales.Rubritaleaceae                                              | post-exposure           | unexposed         | 4.995      | 0.0009   |
| Verrucomicrobia.Verrucomicrobiae.Verrucomicrobiales.Rubritaleaceae.Rubritaleaceae_unclassified                  | post-exposure           | unexposed         | 4.995      | 0.0009   |
| Verrucomicrobia.Verrucomicrobiae.Verrucomicrobiales.Rubritaleaceae.Rubritaleaceae_unclassified.Otu0001          | post-exposure           | unexposed         | 4.995      | 0.0009   |

|                                                                                                                     |                 |           |       |         |
|---------------------------------------------------------------------------------------------------------------------|-----------------|-----------|-------|---------|
| Verrucomicrobia.Verrucomicrobiae.Verrucomicrobiales.Verrucomicrobiales_unclassified                                 | post-exposure   | unexposed | 3.495 | 0.0203  |
| Verrucomicrobia.Verrucomicrobiae.Verrucomicrobiales.Verrucomicrobiales_unclassified.Verrucomicrobiales_unclassified | post-exposure   | unexposed | 4.02  | 0.0203  |
| Bacteroidetes                                                                                                       | recovery period | exposed   | 5.191 | <0.0001 |
| Bacteroidetes.Bacteroidia                                                                                           | recovery period | exposed   | 5.191 | <0.0001 |
| Bacteroidetes.Bacteroidia.Flavobacteriales                                                                          | recovery period | exposed   | 5.223 | <0.0001 |
| Bacteroidetes.Bacteroidia.Flavobacteriales.Weeksellaceae                                                            | recovery period | exposed   | 5.201 | <0.0001 |
| Bacteroidetes.Bacteroidia.Flavobacteriales.Weeksellaceae.Weeksellaceae_unclassified                                 | recovery period | exposed   | 5.186 | <0.0001 |
| Bacteroidetes.Bacteroidia.Flavobacteriales.Weeksellaceae.Weeksellaceae_unclassified.Otu0002                         | recovery period | exposed   | 5.185 | <0.0001 |
| Proteobacteria.Gammaproteobacteria.Xanthomonadales                                                                  | recovery period | exposed   | 3.148 | 0.0286  |
| Proteobacteria.Gammaproteobacteria.Xanthomonadales.Xanthomonadaceae                                                 | recovery period | exposed   | 3.128 | 0.0286  |
| Verrucomicrobia                                                                                                     | recovery period | unexposed | 5.264 | <0.0001 |
| Verrucomicrobia.Verrucomicrobiae                                                                                    | recovery period | unexposed | 5.264 | <0.0001 |
| Verrucomicrobia.Verrucomicrobiae.Verrucomicrobiales                                                                 | recovery period | unexposed | 5.264 | <0.0001 |
| Verrucomicrobia.Verrucomicrobiae.Verrucomicrobiales.Rubritaleaceae                                                  | recovery period | unexposed | 5.262 | <0.0001 |
| Verrucomicrobia.Verrucomicrobiae.Verrucomicrobiales.Rubritaleaceae.Rubritaleaceae_unclassified                      | recovery period | unexposed | 5.262 | <0.0001 |
| Verrucomicrobia.Verrucomicrobiae.Verrucomicrobiales.Rubritaleaceae.Rubritaleaceae_unclassified.Otu0001              | recovery period | unexposed | 5.262 | <0.0001 |
| Verrucomicrobia.Verrucomicrobiae.Verrucomicrobiales.Verrucomicrobiales_unclassified                                 | recovery period | unexposed | 4.889 | <0.0001 |
| Verrucomicrobia.Verrucomicrobiae.Verrucomicrobiales.Verrucomicrobiales_unclassified.Verrucomicrobiales_unclassified | recovery period | unexposed | 4.761 | <0.0001 |
